# Supplementary material for: A theoretical study on the thermal ring opening rearrangement of 1H-bicyclo[3.1.0]hexa-3,5-dien-2-one: a case of two state reactivity
Source: Royal Society of Chemistry journal article supplement (doi:10.1039/b906404d), 2009-01-01
Supplement: b906404d.pdf [file b906404d.pdf]

# **ELECTRONIC SUPPLEMENTARY INFORMATION**

**A Theoretical Study on the Thermal Ring Opening Rearrangement of  
1*H*-bicyclo[3.1.0]hexa-3,5-dien-2-one: A Case of Two State Reactivity.**

**Patricio González-Navarrete,<sup>1</sup> Pedro B. Coto,<sup>2</sup> Victor Polo,<sup>3</sup> and Juan Andrés<sup>1\*</sup>**

<sup>1</sup>Departament de Química Física i Analítica, Universitat Jaume I, 12071, Castelló,  
Spain.

<sup>2</sup>Instituto de Ciencia Molecular (ICMOL), Universidad de Valencia, 46071, Valencia,  
Spain.

<sup>3</sup>Departamento de Química Orgánica y Química Física, Universidad de Zaragoza,  
50009, Zaragoza, Spain.

### **1. Some Computational Details.**

In order to reduce a systematic error found in the CASPT2 calculation that leads to a relative overestimation of the correlation energy for open shell systems, the  $H_0$  Hamiltonian used in this work has been modified using the IPEA shift.<sup>1</sup> The value employed was the one recommended in ref. 1 (0.25 au). Though the use of the IPEA corrected  $H_0$  Hamiltonian seems also to contribute to reduce the problem of the intruder states, in all the single point calculations carried out at each of the MEP points, an imaginary level shift<sup>2</sup> of 0.05 au was used to minimize the effects of some intruder states present at the initial steps of the MEP. All the single point CASPT2 computations along the MEP were carried out using two roots equal weights state average CASSCF wavefunctions as references for both the singlet and triplet states.

**Table S1.** CASSCF(8,8)/ANO-S [4s3p1d/2s1p] (left) and CASPT2/ANO-S [4s3p1d/2s1p] (right) optimised geometries for the most significant structures belonging to the singlet manifolds involved in the reaction. Coordinates in Bohrs

|                                                                                                                                                                                                                                                                                                                                                                                                                    |                                                                                                                                                                                                                                                                                                                                                                                                                    |
|--------------------------------------------------------------------------------------------------------------------------------------------------------------------------------------------------------------------------------------------------------------------------------------------------------------------------------------------------------------------------------------------------------------------|--------------------------------------------------------------------------------------------------------------------------------------------------------------------------------------------------------------------------------------------------------------------------------------------------------------------------------------------------------------------------------------------------------------------|
| C 1.864483 -0.182050 0.029909<br>C 0.860922 2.486085 0.100988<br>C -1.669910 2.575648 -0.190544<br>C -2.577979 -0.064590 -0.339633<br>C -0.352902 -1.903299 -0.575956<br>C -2.569649 -2.039872 1.165612<br>O 4.052502 -0.746439 0.232641<br>H 2.068449 4.065763 0.493400<br>H -2.843728 4.221297 -0.087184<br>H -3.214433 -2.823709 2.908246<br>H -0.137900 -3.159897 -2.159778<br><br><b>R(<sup>1</sup>A)</b>     | C 1.911601 -0.170808 0.027364<br>C 0.889366 2.505693 0.048060<br>C -1.667259 2.575354 -0.195088<br>C -2.541032 -0.066737 -0.296391<br>C -0.338510 -1.895405 -0.532684<br>C -2.640588 -2.075599 1.187302<br>O 4.137962 -0.735587 0.199428<br>H 2.092642 4.109857 0.454363<br>H -2.868168 4.224086 -0.063107<br>H -3.359738 -2.904976 2.903126<br>H -0.136421 -3.136942 -2.154671<br><br><b>R(<sup>1</sup>A)</b>     |
| C -1.808847 -0.367520 -0.140751<br>C -1.033774 2.336600 -0.219294<br>C 1.447684 2.656083 0.231812<br>C 2.905020 0.302746 0.367983<br>C 0.368979 -2.048542 0.548356<br>C 2.818702 -1.964244 -0.664560<br>O -3.957036 -1.082940 -0.349815<br>H -2.351133 3.809923 -0.674479<br>H 2.399266 4.445847 0.223684<br>H 4.092446 -3.313562 -1.462109<br>H 0.122981 -3.070560 2.292063<br><br><b>TS1(<sup>1</sup>A)</b>      | C -1.842338 -0.337329 -0.108136<br>C -1.055143 2.363402 -0.211201<br>C 1.454944 2.663531 0.201603<br>C 2.908835 0.336265 0.409572<br>C 0.349937 -2.056754 0.410324<br>C 2.895642 -1.948497 -0.628824<br>O -4.043935 -1.056687 -0.113200<br>H -2.372090 3.855180 -0.694959<br>H 2.434186 4.460852 0.128766<br>H 4.241279 -3.327915 -1.300438<br>H 0.032971 -3.248218 2.059382<br><br><b>TS1(<sup>1</sup>A)</b>      |
| C 0.000000 0.000000 -3.638333<br>C 0.000000 2.337204 -2.105503<br>C 0.000000 2.381287 0.445510<br>C 0.000000 0.000000 1.902904<br>O 0.000000 0.000000 4.191167<br>H 0.000000 4.094030 -3.128444<br>H 0.000000 4.104808 1.521142<br>C 0.000000 -2.337204 -2.105503<br>C 0.000000 -2.381287 0.445510<br>H 0.000000 -4.094030 -3.128444<br>H 0.000000 -4.104808 1.521142<br><br><b>TS2(<sup>1</sup>A<sub>1</sub>)</b> | C 0.000000 0.000000 -3.658539<br>C 0.000000 2.337013 -2.122789<br>C 0.000000 2.393077 0.447884<br>C 0.000000 0.000000 1.904422<br>O 0.000000 0.000000 4.233162<br>H 0.000000 4.115143 -3.150310<br>H 0.000000 4.126834 1.546265<br>C 0.000000 -2.337013 -2.122789<br>C 0.000000 -2.393077 0.447884<br>H 0.000000 -4.115143 -3.150310<br>H 0.000000 -4.126834 1.546265<br><br><b>TS2(<sup>1</sup>A<sub>1</sub>)</b> |
| C 0.000000 0.000000 -3.369982<br>C 0.000000 2.329846 -2.189103<br>C 0.000000 2.334305 0.448790<br>C 0.000000 0.000000 1.819117<br>O 0.000000 0.000000 4.204346<br>H 0.000000 4.059683 -3.246772<br>H 0.000000 4.062509 1.511314<br>C 0.000000 -2.329846 -2.189103<br>C 0.000000 -2.334305 0.448790<br>H 0.000000 -4.059683 -3.246772<br>H 0.000000 -4.062509 1.511314<br><br><b>P(<sup>1</sup>B<sub>1</sub>)</b>   | C 0.000000 0.000000 -3.360724<br>C 0.000000 2.349587 -2.200385<br>C 0.000000 2.349050 0.444794<br>C 0.000000 0.000000 1.842523<br>O 0.000000 0.000000 4.241528<br>H 0.000000 4.092936 -3.273294<br>H 0.000000 4.091452 1.524721<br>C 0.000000 -2.349587 -2.200385<br>C 0.000000 -2.349050 0.444794<br>H 0.000000 -4.092936 -3.273294<br>H 0.000000 -4.091452 1.524721<br><br><b>P(<sup>1</sup>B<sub>1</sub>)</b>   |
| C 0.759721 0.000000 -3.325723<br>C 0.157369 2.321214 -2.169620<br>C 0.006152 2.360617 0.428202<br>C 0.003427 0.000000 1.852009<br>O -0.047511 0.000000 4.172925<br>H 0.141399 4.040439 -3.247877<br>H -0.001337 4.089794 1.490661<br>C 0.157369 -2.321214 -2.169620<br>C 0.006152 -2.360617 0.428202<br>H 0.141399 -4.040439 -3.247877<br>H -0.001337 -4.089794 1.490661<br><br><b>P(<sup>1</sup>A')</b>           | C 0.662118 0.000000 -3.297231<br>C 0.154312 2.339519 -2.198357<br>C 0.013355 2.355111 0.433284<br>C -0.016427 0.000000 1.847375<br>O -0.095079 0.000000 4.228710<br>H 0.178754 4.076454 -3.283202<br>H 0.039676 4.100182 1.509819<br>C 0.154312 -2.339519 -2.198357<br>C 0.013355 -2.355111 0.433284<br>H 0.178754 -4.076454 -3.283202<br>H 0.039676 -4.100182 1.509819<br><br><b>P(<sup>1</sup>A')</b>            |

**Table S2.** CASSCF(8,8)/ANO-S [4s3p1d/2s1p] (left) and CASPT2/ANO-S [4s3p1d/2s1p] (right) optimised geometries for the most significant structures belonging to the triplet PES involved in the reaction. Coordinates in Bohrs

|                                                                                                                                                                                                                                                                                                                                                                                                                                                 |                                                                                                                                                                                                                                                                                                                                                                                                                                                 |
|-------------------------------------------------------------------------------------------------------------------------------------------------------------------------------------------------------------------------------------------------------------------------------------------------------------------------------------------------------------------------------------------------------------------------------------------------|-------------------------------------------------------------------------------------------------------------------------------------------------------------------------------------------------------------------------------------------------------------------------------------------------------------------------------------------------------------------------------------------------------------------------------------------------|
| C -1.786685 -0.334293 0.016254<br>C -0.994337 2.337865 -0.332383<br>C 1.462668 2.609658 0.272391<br>C 2.583418 0.178888 1.086554<br>C 0.495978 -1.816243 0.877733<br>C 2.836190 -1.877046 -0.732491<br>O -3.877411 -1.172419 -0.250282<br>H -2.234617 3.756526 -1.075815<br>H 2.554340 4.305118 0.073603<br>H 4.157527 -3.413762 -0.642210<br>H 0.196509 -3.374472 2.144122<br><p style="text-align: center;"><b>R(<sup>3</sup>A)</b></p>       | C -1.822040 -0.304412 0.027976<br>C -1.035104 2.370345 -0.301411<br>C 1.463427 2.600199 0.251772<br>C 2.561291 0.182101 1.070274<br>C 0.496050 -1.798290 0.835361<br>C 2.948763 -1.859714 -0.719297<br>O -3.941750 -1.182346 -0.207955<br>H -2.286932 3.816937 -1.021649<br>H 2.601455 4.279737 -0.010679<br>H 4.214015 -3.460223 -0.502741<br>H 0.194404 -3.444513 2.015825<br><p style="text-align: center;"><b>R(<sup>3</sup>A)</b></p>      |
| C -1.751523 -0.282457 0.038568<br>C -1.005420 2.384985 -0.267574<br>C 1.496076 2.760839 0.107288<br>C 2.945647 0.484406 0.500652<br>C 0.420889 -2.078834 0.449138<br>C 2.694233 -1.878268 -0.946411<br>O -3.900891 -1.035766 0.059997<br>H -2.372142 3.808215 -0.724472<br>H 2.395069 4.579219 0.076639<br>H 4.080670 -3.352491 -0.768848<br>H 0.001676 -3.686020 1.627912<br><p style="text-align: center;"><b>TS1(<sup>3</sup>A)</b></p>      | C -1.788849 -0.245854 -0.037094<br>C -1.092131 2.412598 -0.156901<br>C 1.505205 2.721502 0.126869<br>C 2.871259 0.468236 0.235240<br>C 0.457281 -2.005471 0.397201<br>C 2.756921 -1.983959 -0.991734<br>O -3.929750 -1.142266 -0.145989<br>H -2.445693 3.896565 -0.535765<br>H 2.458428 4.534298 0.106223<br>H 4.126035 -3.466390 -0.628616<br>H 0.085579 -3.485430 1.783458<br><p style="text-align: center;"><b>TS1(<sup>3</sup>A)</b></p>    |
| C 0.000000 0.000000 -3.398873<br>C 0.000000 2.353326 -2.159369<br>C 0.000000 2.368071 0.432387<br>C 0.000000 0.000000 1.856783<br>O 0.000000 0.000000 4.172401<br>H 0.000000 4.080329 -3.224118<br>H 0.000000 4.092903 1.501056<br>C 0.000000 -2.353326 -2.159369<br>C 0.000000 -2.368071 0.432387<br>H 0.000000 -4.080329 -3.224118<br>H 0.000000 -4.092903 1.501056<br><p style="text-align: center;"><b>P(<sup>3</sup>B<sub>1</sub>)</b></p> | C 0.000000 0.000000 -3.380897<br>C 0.000000 2.359891 -2.182430<br>C 0.000000 2.365970 0.435040<br>C 0.000000 0.000000 1.856929<br>O 0.000000 0.000000 4.225745<br>H 0.000000 4.103443 -3.256477<br>H 0.000000 4.106423 1.518089<br>C 0.000000 -2.359891 -2.182430<br>C 0.000000 -2.365970 0.435040<br>H 0.000000 -4.103443 -3.256477<br>H 0.000000 -4.106423 1.518089<br><p style="text-align: center;"><b>P(<sup>3</sup>B<sub>1</sub>)</b></p> |

**Table S3.** CASSCF(8,8)/ANO-S [4s3p1d/2s1p] (left) and CASPT2/ANO-S [4s3p1d/2s1p] (right) optimised geometries of the different minimum energy crossing points located. Coordinates in Bohrs.

|                                                                                                                                                                                                                                                                                                                                                                                                                           |                                                                                                                                                                                                                                                                                                                                                                                                                           |
|---------------------------------------------------------------------------------------------------------------------------------------------------------------------------------------------------------------------------------------------------------------------------------------------------------------------------------------------------------------------------------------------------------------------------|---------------------------------------------------------------------------------------------------------------------------------------------------------------------------------------------------------------------------------------------------------------------------------------------------------------------------------------------------------------------------------------------------------------------------|
| C 0.000000 0.000000 -3.53962<br>C 0.000000 2.335460 -2.14878<br>C 0.000000 2.369381 0.43133<br>C 0.000000 0.000000 1.86512<br>O 0.000000 0.000000 4.17552<br>H 0.000000 4.083204 -3.18407<br>H 0.000000 4.094607 1.50188<br>C 0.000000 -2.335460 -2.14878<br>C 0.000000 -2.369381 0.43133<br>H 0.000000 -4.083204 -3.18407<br>H 0.000000 -4.094607 1.50188<br><p style="text-align: center;"><b>CI</b></p>                | C 0.000000 0.000000 -3.676958<br>C 0.000000 2.336769 -2.143207<br>C 0.000000 2.392514 0.427681<br>C 0.000000 0.000000 1.882873<br>O 0.000000 0.000000 4.212115<br>H 0.000000 4.114903 -3.170468<br>H 0.000000 4.124980 1.527949<br>C 0.000000 -2.336769 -2.143207<br>C 0.000000 -2.392514 0.427681<br>H 0.000000 -4.114903 -3.170468<br>H 0.000000 -4.124980 1.527949<br><p style="text-align: center;"><b>CI</b></p>     |
| C 0.973593 0.000000 -3.287566<br>C 0.122673 2.299481 -2.160408<br>C -0.026240 2.365461 0.418744<br>C 0.017216 0.000000 1.867367<br>O 0.023593 0.000000 4.169884<br>H 0.089481 4.009489 -3.255328<br>H -0.031712 4.100102 1.473120<br>C 0.122673 -2.299481 -2.160408<br>C -0.026240 -2.365461 0.418744<br>H 0.089481 -4.009489 -3.255328<br>H -0.031712 4.100102 1.473120<br><p style="text-align: center;"><b>ISC</b></p> | C 0.973593 0.000000 -3.287566<br>C 0.122673 2.299481 -2.160408<br>C -0.026240 2.365461 0.418744<br>C 0.017216 0.000000 1.867367<br>O 0.023593 0.000000 4.169884<br>H 0.089481 4.009489 -3.255328<br>H -0.031712 4.100102 1.473120<br>C 0.122673 -2.299481 -2.160408<br>C -0.026240 -2.365461 0.418744<br>H 0.089481 -4.009489 -3.255328<br>H -0.031712 4.100102 1.473120<br><p style="text-align: center;"><b>ISC</b></p> |

**Table S4.** B3LYP/6-311+G(2df,2p) (left) and M05-2X/6-311+G(2df,2p) (right) optimised geometries for the most significant structures belonging to the singlet manifold involved in the reaction. Coordinates in Angstroms

|                                                                                                                                                                                                                                                                                                                                                                                                                                                     |                                                                                                                                                                                                                                                                                                                                                                                                                                                      |
|-----------------------------------------------------------------------------------------------------------------------------------------------------------------------------------------------------------------------------------------------------------------------------------------------------------------------------------------------------------------------------------------------------------------------------------------------------|------------------------------------------------------------------------------------------------------------------------------------------------------------------------------------------------------------------------------------------------------------------------------------------------------------------------------------------------------------------------------------------------------------------------------------------------------|
| C -0.978947 -0.191201 -0.024882<br>C -0.556061 1.258646 -0.089469<br>C 0.767412 1.416775 0.089974<br>C 1.343309 0.085556 0.249823<br>C 0.277228 -0.971283 0.370638<br>O -2.112760 -0.593367 -0.120763<br>C 1.576941 -1.018878 -0.390905<br>H -1.244274 2.033910 -0.392019<br>H 1.329467 2.332178 -0.021774<br>H 2.124284 -1.527986 -1.166525<br>H 0.158714 -1.558321 1.276919<br><p style="text-align: center;"><b>R(<sup>1</sup>A)</b></p>         | C -0.970444 -0.192394 -0.018451<br>C -0.549549 1.259401 -0.095544<br>C 0.765711 1.417148 0.090107<br>C 1.337256 0.077820 0.245909<br>C 0.277404 -0.969013 0.385671<br>O -2.098721 -0.587658 -0.120170<br>C 1.557266 -1.021883 -0.397433<br>H -1.239703 2.029783 -0.393091<br>H 1.326575 2.330011 -0.008076<br>H 2.079601 -1.527096 -1.187296<br>H 0.160650 -1.542482 1.295212<br><p style="text-align: center;"><b>R(<sup>1</sup>A)</b></p>          |
| C -0.984439 -0.119146 -0.046198<br>C -0.549894 1.295887 -0.068862<br>C 0.780071 1.427901 0.078856<br>C 1.488328 0.191571 0.225274<br>C 0.184695 -1.031822 0.178109<br>O -2.138567 -0.501359 -0.040800<br>C 1.541331 -1.001695 -0.304973<br>H -1.240269 2.098442 -0.286877<br>H 1.326730 2.354252 -0.037288<br>H 2.261121 -1.752842 -0.596255<br>H -0.021825 -1.737871 0.979599<br><p style="text-align: center;"><b>TS1(<sup>1</sup>A)</b></p>      | C -0.978116 -0.145768 -0.043340<br>C -0.544116 1.261600 -0.070933<br>C 0.781806 1.391834 0.067969<br>C 1.508175 0.173064 0.241523<br>C 0.164656 -1.085004 0.132318<br>O -2.130470 -0.519680 -0.020423<br>C 1.530235 -1.025246 -0.282123<br>H -1.237778 2.062173 -0.266347<br>H 1.324845 2.315606 -0.051809<br>H 2.251711 -1.793297 -0.501723<br>H -0.076441 -1.854810 0.856302<br><p style="text-align: center;"><b>TS1(<sup>1</sup>A)</b></p>       |
| C 0.000000 0.000000 1.003101<br>O 0.000000 0.000000 2.220049<br>C 0.000000 1.265864 0.230031<br>C 0.000000 -1.265864 0.230031<br>C 0.000000 1.233266 -1.114798<br>C 0.000000 -1.233266 -1.114798<br>C 0.000000 0.000000 -1.909350<br>H 0.000000 2.179133 0.813642<br>H 0.000000 -2.179133 0.813642<br>H 0.000000 2.169703 -1.662177<br>H 0.000000 -2.169703 -1.662177<br><p style="text-align: center;"><b>TS2(<sup>1</sup>A<sub>1</sub>)</b></p>   | C 0.000000 0.000000 0.997046<br>O 0.000000 0.000000 2.205283<br>C 0.000000 1.265554 0.227410<br>C 0.000000 -1.265554 0.227410<br>C 0.000000 1.235042 -1.109539<br>C 0.000000 -1.235042 -1.109539<br>C 0.000000 0.000000 -1.901909<br>H 0.000000 2.173501 0.812645<br>H 0.000000 -2.173501 0.812645<br>H 0.000000 2.166270 -1.657127<br>H 0.000000 -2.166270 -1.657127<br><p style="text-align: center;"><b>TS2(<sup>1</sup>A<sub>1</sub>)</b></p>    |
| C 0.000000 0.000000 0.000000<br>O 0.000000 0.000000 1.263170<br>C 1.243093 0.000000 -0.748362<br>C -1.243093 0.000000 -0.748362<br>C 1.241131 0.000000 -2.136408<br>C -1.241131 0.000000 -2.136408<br>C 0.000000 0.000000 -2.755943<br>H 2.167182 0.000000 -0.177123<br>H -2.167182 0.000000 -0.177123<br>H 2.167156 0.000000 -2.704997<br>H -2.167156 0.000000 -2.704997<br><p style="text-align: center;"><b>P(<sup>1</sup>B<sub>1</sub>)</b></p> | C 0.000000 0.000000 -0.004463<br>O 0.000000 0.000000 1.246098<br>C 1.236952 0.000000 -0.744361<br>C -1.236952 0.000000 -0.744361<br>C 1.236325 0.000000 -2.121618<br>C -1.236325 0.000000 -2.121618<br>C 0.000000 0.000000 -2.728454<br>H 2.151370 0.000000 -0.172774<br>H -2.151370 0.000000 -0.172774<br>H 2.153276 0.000000 -2.688517<br>H -2.153276 0.000000 -2.688517<br><p style="text-align: center;"><b>P(<sup>1</sup>B<sub>1</sub>)</b></p> |
| C 0.000141 -0.000491 0.000068<br>C 0.000062 -0.000356 1.469622<br>C 1.175246 -0.000092 2.168614<br>C 2.294279 -0.333382 1.402958<br>C 1.312183 0.080702 -0.656849<br>O -1.045415 -0.023932 -0.645977<br>C 2.464015 0.079523 0.079990<br>H -0.960758 -0.072160 1.962620<br>H 1.202413 0.020258 3.250857<br>H 3.441797 0.158598 -0.378368<br>H 1.323315 0.068941 -1.739030<br><p style="text-align: center;"><b>P(<sup>1</sup>A')</b></p>             | C 0.006285 -0.005847 0.003683<br>C 0.002793 0.005874 1.474553<br>C 1.168899 -0.005495 2.166520<br>C 2.280184 -0.382082 1.398728<br>C 1.320045 0.082095 -0.651989<br>O -1.027897 -0.040003 -0.638148<br>C 2.459360 0.069175 0.083228<br>H -0.959598 -0.030586 1.960366<br>H 1.201475 0.023672 3.244757<br>H 3.437434 0.153052 -0.364927<br>H 1.326628 0.101703 -1.730466<br><p style="text-align: center;"><b>P(<sup>1</sup>A')</b></p>               |

**Table S5.** B3LYP/6-311+G(2df,2p) (left) and M05-2X/6-311+G(2df,2p) (right) optimised geometries for the most significant structures belonging to the triplet manifold involved in the reaction. Coordinates in Angstroms

|                                                                                                                                                                                                                                                                                                                                                                                                                                                     |                                                                                                                                                                                                                                                                                                                                                                                                                                                     |
|-----------------------------------------------------------------------------------------------------------------------------------------------------------------------------------------------------------------------------------------------------------------------------------------------------------------------------------------------------------------------------------------------------------------------------------------------------|-----------------------------------------------------------------------------------------------------------------------------------------------------------------------------------------------------------------------------------------------------------------------------------------------------------------------------------------------------------------------------------------------------------------------------------------------------|
| C -0.976913 -0.092002 -0.001772<br>C -0.583529 1.278233 -0.049796<br>C 0.805311 1.410741 0.088225<br>C 1.439005 0.189858 0.110211<br>C 0.237827 -1.011417 0.323270<br>O -2.077613 -0.611481 -0.121488<br>C 1.463692 -1.103704 -0.385169<br>H -1.268746 2.086552 -0.253205<br>H 1.342243 2.346739 0.039066<br>H 2.192318 -1.896698 -0.341921<br>H 0.032491 -1.682598 1.157147<br><p style="text-align: center;"><b>R(<sup>3</sup>A)</b></p>          | C 0.965304 -0.075227 -0.022676<br>C 0.396746 1.290759 0.133955<br>C -0.930197 1.264434 -0.101771<br>C -1.365957 -0.073008 -0.463766<br>C -0.201331 -0.972074 -0.387884<br>O 2.119866 -0.391963 0.077470<br>C -1.358880 -1.117312 0.562251<br>H 0.992612 2.134145 0.437706<br>H -1.608539 2.087826 0.047840<br>H -1.378455 -1.067266 1.639714<br>H -0.015692 -1.807955 -1.047330<br><p style="text-align: center;"><b>R(<sup>3</sup>A)</b></p>       |
| C -0.976913 -0.092002 -0.001772<br>C -0.583529 1.278233 -0.049796<br>C 0.805311 1.410741 0.088225<br>C 1.439005 0.189858 0.110211<br>C 0.237827 -1.011417 0.323270<br>O -2.077613 -0.611481 -0.121488<br>C 1.463692 -1.103704 -0.385169<br>H -1.268746 2.086552 -0.253205<br>H 1.342243 2.346739 0.039066<br>H 2.192318 -1.896698 -0.341921<br>H 0.032491 -1.682598 1.157147<br><p style="text-align: center;"><b>TS1(<sup>3</sup>A)</b></p>        | C -0.970623 -0.098671 -0.003702<br>C -0.581928 1.275564 -0.050533<br>C 0.799884 1.412893 0.090344<br>C 1.428751 0.193487 0.106539<br>C 0.236336 -1.012617 0.312252<br>O -2.069311 -0.607149 -0.114502<br>C 1.463727 -1.099756 -0.386961<br>H -1.273418 2.075583 -0.244365<br>H 1.337597 2.344306 0.043392<br>H 2.187601 -1.888916 -0.305792<br>H 0.029414 -1.697988 1.128754<br><p style="text-align: center;"><b>TS1(<sup>3</sup>A)</b></p>        |
| C 0.000000 0.000000 0.000000<br>O 0.000000 0.000000 1.249360<br>C 1.243643 0.000000 -0.750851<br>C -1.243643 0.000000 -0.750851<br>C 1.238923 0.000000 -2.127404<br>C -1.238923 0.000000 -2.127404<br>C 0.000000 0.000000 -2.748589<br>H 2.164073 0.000000 -0.182518<br>H -2.164073 0.000000 -0.182518<br>H 2.159578 0.000000 -2.695874<br>H -2.159578 0.000000 -2.695874<br><p style="text-align: center;"><b>P(<sup>3</sup>B<sub>1</sub>)</b></p> | C 0.000000 0.000000 0.000000<br>O 0.000000 0.000000 1.241041<br>C 1.242392 0.000000 -0.746406<br>C -1.242392 0.000000 -0.746406<br>C 1.239776 0.000000 -2.117098<br>C -1.239776 0.000000 -2.117098<br>C 0.000000 0.000000 -2.733920<br>H 2.156087 0.000000 -0.174064<br>H -2.156087 0.000000 -0.174064<br>H 2.156706 0.000000 -2.684278<br>H -2.156706 0.000000 -2.684278<br><p style="text-align: center;"><b>P(<sup>3</sup>B<sub>1</sub>)</b></p> |

**Table S6.** B3LYP/6-311+G(2df,2p) (left) and M05-2X/6-311+G(2df,2p) (right) optimised geometries of the different minimum energy crossing points located. Coordinates in Angstroms

|   |           |            |           |   |           |            |           |
|---|-----------|------------|-----------|---|-----------|------------|-----------|
| C | -1.711852 | 0.000084   | 0.279862  | C | -1.695909 | -0.000011  | 0.318513  |
| C | -1.156486 | 1.226297   | -0.093079 | C | -1.148681 | 1.224032   | -0.095276 |
| C | 0.209112  | 1.249054   | -0.052078 | C | 0.205435  | 1.251820   | -0.052409 |
| C | 0.980149  | 0.000074   | 0.010314  | C | 0.976902  | 0.000012   | 0.021687  |
| C | 0.209203  | -1.249105  | -0.052213 | C | 0.205435  | -1.251845  | -0.052411 |
| C | -1.156667 | -1.226515  | -0.093234 | C | -1.148680 | -1.224009  | -0.095272 |
| H | -1.745358 | 2.132607   | -0.164141 | H | -1.745106 | 2.119697   | -0.177212 |
| H | 0.767335  | 2.173978   | 0.006514  | H | 0.764484  | 2.173449   | -0.014967 |
| H | 0.767266  | -2.173846  | 0.006526  | H | 0.764479  | -2.173439  | -0.014969 |
| H | -1.745328 | -2.132638  | -0.164255 | H | -1.745112 | -2.119704  | -0.177212 |
| O | 2.207168  | 0.000009   | 0.066169  | O | 2.191294  | -0.000001  | 0.089919  |
|   |           | <b>ISC</b> |           |   |           | <b>ISC</b> |           |

**Table S7.** Absolute electronic energies (in au) and zero point corrected values (evaluated at the CASSCF level) for all the structures located on the PESs as computed at the CASSCF/ANO-S [4s3p1d/2s1p] and CASPT2//CASSCF/ANO-S [4s3p1d/2s1p] theoretical levels.

| Surface | Structure                          | E          |            |                |                |
|---------|------------------------------------|------------|------------|----------------|----------------|
|         |                                    | CASSCF     | CASSCF+ZPE | CASPT2         | CASPT2+ZPE     |
| CSS     | R( <sup>1</sup> A)                 | -304.42272 | -304.34096 | -305.30391     | -305.22216     |
|         | TS1( <sup>1</sup> A)               | -304.41308 | -304.33241 | -305.29305     | -305.21238     |
|         | P( <sup>1</sup> A')                | -304.43830 | -304.35766 | -305.31168     | -305.23104     |
|         | TS2( <sup>1</sup> A <sub>1</sub> ) | -304.42958 | -304.34786 | -305.28630     | -305.20458     |
| OSS     | P( <sup>1</sup> B <sub>1</sub> )   | -304.43699 | -304.35723 | -305.31191     | -305.23215     |
|         | R( <sup>3</sup> A)                 | -304.36323 | -304.28170 | -305.24393     | -305.16240     |
| T       | TS1( <sup>3</sup> A)               | -304.34100 | -304.26175 | -305.22188     | -305.14263     |
|         | P( <sup>3</sup> B <sub>1</sub> )   | -304.46073 | -304.37849 | -305.32813     | -305.24589     |
| CSS-T   | ISC                                | -304.43673 | -          | - <sup>a</sup> | - <sup>a</sup> |
| CSS-O   | CI                                 | -304.42589 | -          | - <sup>a</sup> | - <sup>a</sup> |

<sup>a</sup> Differential correlation effects on the states involved break energetic degeneracy.

**Table S8.** Absolute electronic energies (in au) for all the structures located on the PESs as computed at the CASPT2/ANO-S [4s3p1d/2s1p] theoretical level.

| Surface | Structure                          | E          |
|---------|------------------------------------|------------|
| CSS     | R( <sup>1</sup> A)                 | -305.30572 |
|         | TS1( <sup>1</sup> A)               | -305.29486 |
|         | P( <sup>1</sup> A')                | -305.31430 |
|         | TS2( <sup>1</sup> A <sub>1</sub> ) | -305.28756 |
| OSS     | P( <sup>1</sup> B <sub>1</sub> )   | -305.31281 |
|         | R( <sup>3</sup> A)                 | -305.24588 |
| T       | TS1( <sup>3</sup> A)               | -305.22606 |
|         | P( <sup>3</sup> B <sub>1</sub> )   | -305.32979 |
| CSS-T   | ISC                                | -305.31359 |
| CSS-O   | CI                                 | -305.28756 |



**Table S9.** B3LYP/6-311+G(2df,2p) optimized absolute electronic energies (a.u.), thermal corrections to Gibbs free energy (G, in a.u. and at 298,15 K) and zero point energy correction (E+ZPE, in au) for all stationary points on the three potential energy surfaces.

| Surface | Structure                          | E          | G          | E+ZPE      |
|---------|------------------------------------|------------|------------|------------|
| CSS     | R( <sup>1</sup> A)                 | -306.21053 | -306.16196 | -306.13293 |
|         | TS1( <sup>1</sup> A)               | -306.20181 | -306.15441 | -306.12551 |
|         | P( <sup>1</sup> A')                | -306.22025 | -306.17149 | -306.14246 |
| OSS     | TS2( <sup>1</sup> A <sub>1</sub> ) | -306.19716 | -306.14813 | -306.11966 |
|         | P( <sup>1</sup> B <sub>1</sub> )   | -306.23883 | -306.18902 | -306.16082 |
| T       | R( <sup>3</sup> A)                 | -306.15322 | -306.10774 | -306.07767 |
|         | TS1( <sup>3</sup> A)               | -306.14727 | -306.10397 | -306.07392 |
|         | P( <sup>3</sup> B <sub>1</sub> )   | -306.24540 | -306.19608 | -306.16690 |

**Table S10.** M05-2X/6-311+G(2df,2p) optimized absolute electronic energies (au), thermal corrections to Gibbs free energy (G, in a.u. and at 298,15 K) and zero point energy correction (E+ZPE, in au) for all stationary points on the three potential energy surfaces.

| Surface | Structure                          | E          | G          | E+ZPE      |
|---------|------------------------------------|------------|------------|------------|
| CSS     | R( <sup>1</sup> A)                 | -306.17394 | -306.12337 | -306.09440 |
|         | TS1( <sup>1</sup> A)               | -306.15827 | -306.10919 | -306.08033 |
|         | P( <sup>1</sup> A')                | -306.17164 | -306.12146 | -306.09238 |
| OSS     | TS2( <sup>1</sup> A <sub>1</sub> ) | -306.15312 | -306.10226 | -306.07380 |
|         | P( <sup>1</sup> B <sub>1</sub> )   | -306.19310 | -306.14178 | -306.11363 |
| T       | R( <sup>3</sup> A)                 | -306.11088 | -306.06339 | -306.03340 |
|         | TS1( <sup>3</sup> A)               | -306.10010 | -306.05530 | -306.02525 |
|         | P( <sup>3</sup> B <sub>1</sub> )   | -306.20241 | -306.15153 | -306.12238 |

**Table S11.** CCSD(T)/6-311+G(2df,2p) electronic energies (in au) calculated on CASPT2/ANO-S [4s3p1d/2s1p] optimized structures.

| Structure           | E           |
|---------------------|-------------|
| R( <sup>1</sup> A)  | -305.563629 |
| P( <sup>1</sup> A') | -305.563520 |

**Table S12.** B3LYP/6-311+G(2df,2p) lowest frequencies values (in  $\text{cm}^{-1}$ , at 298.15 K) and  $\langle S^2 \rangle$  values for all the stationary points on the three potential energy surfaces.

| Surface | Structure      | Lowest Frequency | $\langle S^2 \rangle$ |
|---------|----------------|------------------|-----------------------|
| CSS     | R( $^1A$ )     | 171.4            | 0.0                   |
|         | TS1( $^1A$ )   | -440.5 <i>i</i>  | 0.0                   |
|         | P( $^1A'$ )    | 180.6            | 0.0                   |
|         | TS2( $^1A_1$ ) | -3069.0 <i>i</i> | 0.0                   |
| OSS     | P( $^1B_1$ )   | 199.5            | 1.02                  |
|         | R( $^3A$ )     | 180.8            | 2.02                  |
| T       | TS1( $^3A$ )   | -706.2 <i>i</i>  | 2.00                  |
|         | P( $^3B_1$ )   | 198.2            | 2.04                  |

**Table S13.** M05-2X/6-311+G(2df,2p) lowest frequencies values (in  $\text{cm}^{-1}$ , at 298.15 K) and  $\langle S^2 \rangle$  values for all the stationary points on the three potential energy surfaces.

| Surface | Structure      | Lowest Frequency | $\langle S^2 \rangle$ |
|---------|----------------|------------------|-----------------------|
| CSS     | R( $^1A$ )     | 169.7            | 0.0                   |
|         | TS1( $^1A$ )   | -415.2 <i>i</i>  | 0.0                   |
|         | P( $^1A'$ )    | 170.7            | 0.0                   |
|         | TS2( $^1A_1$ ) | -945.1 <i>i</i>  | 0.0                   |
| OSS     | P( $^1B_1$ )   | 203.3            | 1.04                  |
|         | R( $^3A$ )     | 176.8            | 2.02                  |
| T       | TS1( $^3A$ )   | -842.4 <i>i</i>  | 2.03                  |
|         | P( $^3B_1$ )   | 198.4            | 2.06                  |

## References

- <sup>1</sup> G. Ghigo, B.O. Roos, and P.-Å. Malmqvist, *Chem. Phys. Letters*, 2004, **396**, 142.  
<sup>2</sup> N. Forsberg and P.-Å. Malmqvist. *Chem. Phys. Letters*, 1997, **274**, 196.
